# Supplementary material for: Electronic structure of rhombus-shaped nanographenes: system size evolution from closed- to open-shell ground states
Source: Royal Society of Chemistry journal article supplement (doi:10.1039/d3cp01103h), 2023-01-01
Supplement: d3cp01103h2.pdf [file d3cp01103h2.pdf]

–Supplementary Material–  
**Electronic structure of rhombus-shaped  
nanographenes: system size evolution  
from closed- to open-shell ground states**

M.E. Sandoval-Salinas, R. Bernabeu-Cabañero, E. San-Fabián,  
A.J. Pérez-Jiménez, and J. C. Sancho-García\*

Department of Physical Chemistry,  
University of Alicante,  
E-03080 Alicante, Spain

---

\*E-mail: [jc.sancho@ua.es](mailto:jc.sancho@ua.es)

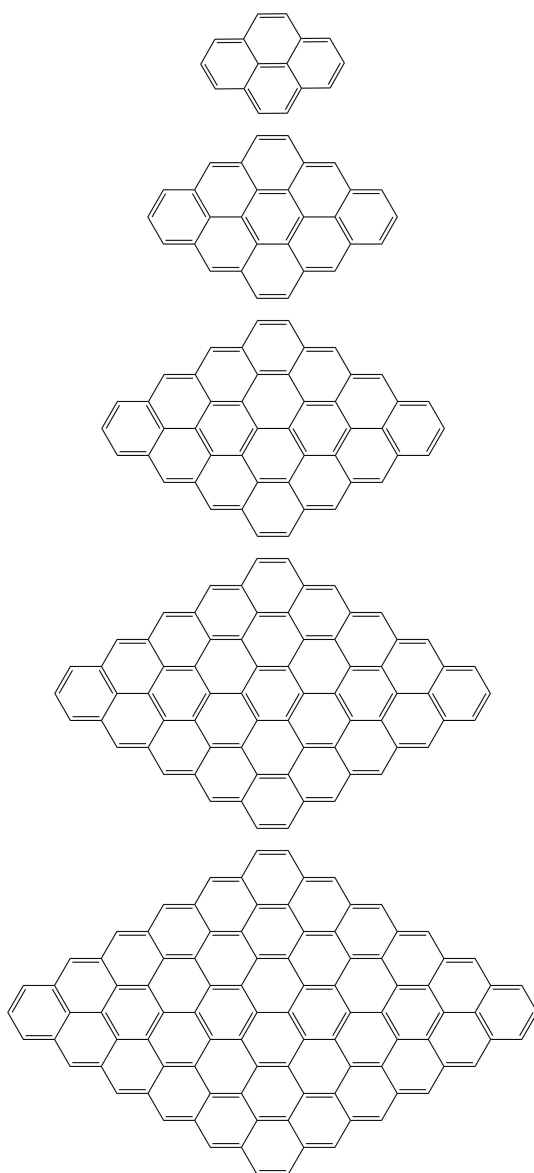

Figure 1: Chemical structures of the  $n$ -rhombenes studied (H atoms are not shown).

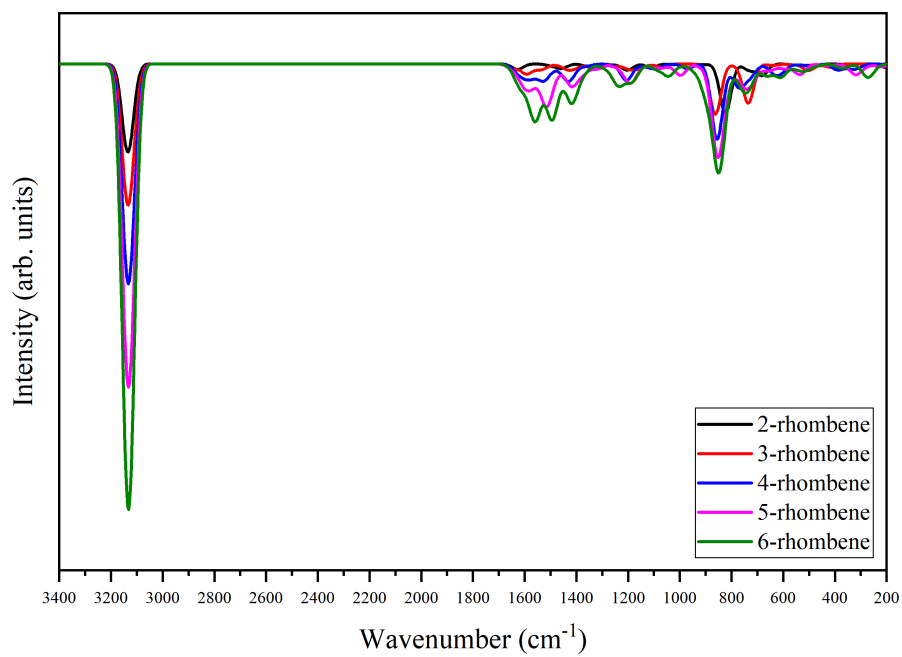

Figure 2: Simulated IR spectra for  $n$ -rhombenes, as calculated at the B97-3c level.

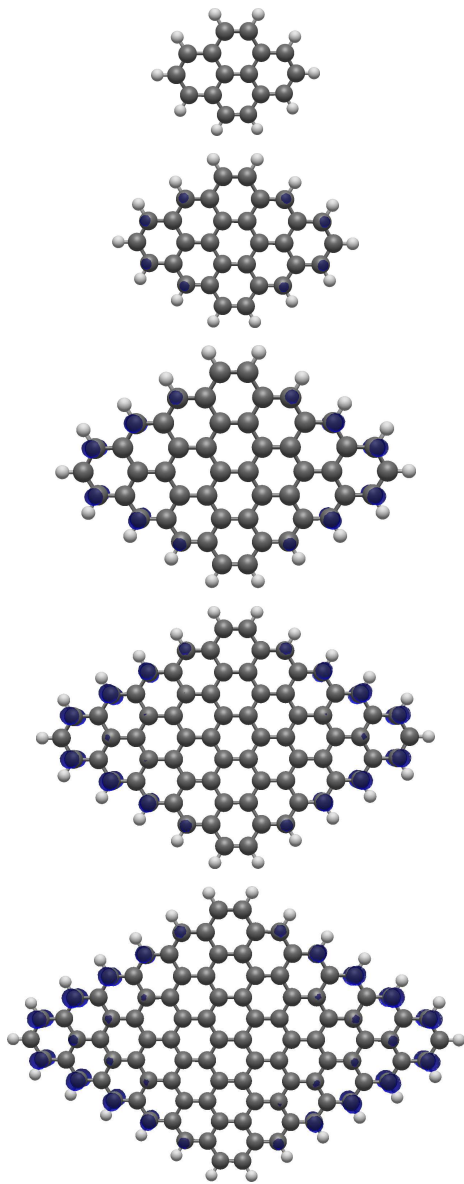

Figure 3: Density plots of  $\rho_U(\mathbf{r})$  ( $\sigma = 0.005$  e/bohr<sup>3</sup>) of  $n$ -rhombenes, as calculated by the FT-TPSS/def2-TZVP method.

Table 1: Number of unpaired electrons ( $N_U$ ) and diradical ( $Y_0$ ), tetraradical ( $Y_1$ ) and hexaradical ( $Y_2$ ) index of the ground state of  $n$ -rhombenes at the RAS-SF/6-31G\* level.

| $[n]$ | $N_U$ | $Y_0$ | $Y_1$ | $Y_2$ |
|-------|-------|-------|-------|-------|
| 2     | 0.20  | 0.056 | 0.034 | 0.002 |
| 3     | 0.45  | 0.145 | 0.038 | 0.030 |
| 4     | 1.06  | 0.313 | 0.080 | 0.043 |
| 5     | 2.17  | 0.670 | 0.263 | 0.049 |
| 6     | 2.78  | 0.892 | 0.374 | 0.101 |

Table 2: HOMO and LUMO energies (eV) of  $n$ -rhombenes, as calculated by DFT/def2-TZVP methods.

| $[n]$ | PBE    |        | PBE0   |        | PBEHH  |        |
|-------|--------|--------|--------|--------|--------|--------|
|       | HOMO   | LUMO   | HOMO   | LUMO   | HOMO   | LUMO   |
| 2     | -5.073 | -2.396 | -5.809 | -1.689 | -6.438 | -0.849 |
| 3     | -4.474 | -3.114 | -5.013 | -2.618 | -5.460 | -1.960 |
| 4     | -4.177 | -3.513 | -4.553 | -3.196 | -4.842 | -2.707 |
| 5     | -4.136 | -3.625 | -4.980 | -2.814 | -      | -      |
| 6     | -4.185 | -3.619 | -4.942 | -2.884 | -      | -      |

Table 3: Energy differences (eV) between the ground-state ( $S_0$ ) and  $S_1$  ( $\Delta E_{SS}$ ),  $T_1$  ( $\Delta E_{ST}$ ), and  $Q_1$  ( $\Delta E_{SQ}$ ) states of  $n$ -rhombenes. All calculations were carried out at the RAS-SF/6-31G\* level.

| $[n]$ | $\Delta E_{ST}$ | $\Delta E_{SS}$ | $\Delta E_{SQ}$ |
|-------|-----------------|-----------------|-----------------|
| 2     | 2.835           | 4.240           | 8.285           |
| 3     | 1.281           | 3.338           | 5.243           |
| 4     | 0.535           | 2.298           | 2.781           |
| 5     | 0.139           | 1.257           | 0.868           |
| 6     | 0.056           | 0.762           | 0.235           |

Table 4: Energy differences (eV) between the ground-state ( $S_0$ ) and  $S_1$  ( $\Delta E_{SS}$ ),  $T_1$  ( $\Delta E_{ST}$ ), and  $Q_1$  ( $\Delta E_{SQ}$ ) states of  $n$ -rhombenes, as calculated by DFT/def2-TZVP methods and corrected by the Yamaguchi expression.

| $[n]$ | PBE             |                 |                 | PBE0            |                 |                 |
|-------|-----------------|-----------------|-----------------|-----------------|-----------------|-----------------|
|       | $\Delta E_{ST}$ | $\Delta E_{SS}$ | $\Delta E_{SQ}$ | $\Delta E_{ST}$ | $\Delta E_{SS}$ | $\Delta E_{SQ}$ |
| 2     | 2.314           | –               | 6.089           | 2.360           | –               | 6.475           |
| 3     | 1.089           | –               | 3.754           | 0.994           | –               | 3.701           |
| 4     | 0.423           | –               | 1.836           | 0.576           | 0.170           | 1.952           |
| 5     | 0.174           | 0.040           | 0.846           | 1.403           | 0.630           | 0.882           |
| 6     | 0.235           | 0.176           | 0.324           | 1.181           | 1.214           | 0.474           |

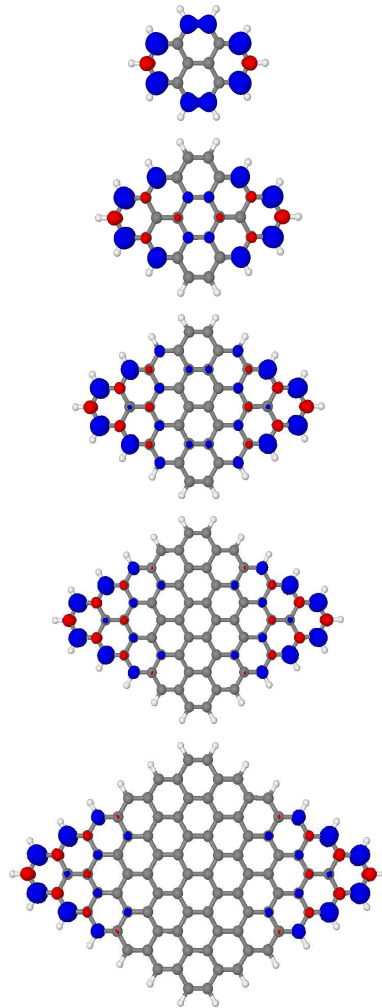

Figure 4: Spin Density plots ( $\sigma = 0.005 \text{ e/bohr}^3$ ) of triplet state of  $n$ -rhombenes, as calculated by the PBE0/def2-TZVP method.

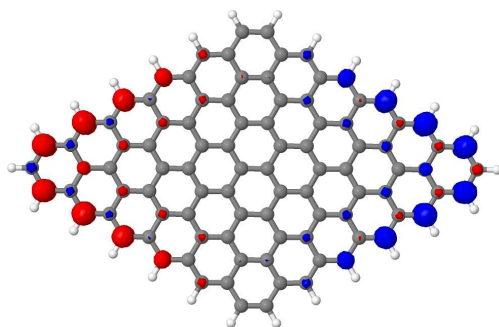

Figure 5: Spin Density plot ( $\sigma = 0.005 \text{ e/bohr}^3$ ) of open-shell singlet state of 6-rhombenes, as calculated by the PBE/def2-TZVP method.
